# Supplementary material
Source: publisher figshare collection journal article supplement (https://scielo.figshare.com/articles/dataset/_/5720248)
Supplement: Supplementary file 1 [file Table_1.xls]

## Sheet: Table_1
<b>Semiologic domain</b>	<b>Before (N = 31) %</b>	<b>After (N = 31) %</b>
Cardiovascular system	100	100
Pulmonary system	100	100
Abdomen	100	100
Vital signs	83.87	100
Palpation of lymph nodes	35,48	100
Neurological	25,81	93,55
Thyroid palpation	16,13	67,74
Oral cavity examination	12,90	96,77
Anthropometric measurements	9,68	70,97
Breast examination<a href="#TFN1">*</a>	5,26	68,42
Ophthalmoscopy	0	35,48
Otoscopy	0	74,19
Testicular examination<a href="#TFN2">**</a>	0	25
Ankle-brachial index	0	90,32
