# Supplementary material
Source: publisher figshare collection journal article supplement (https://scielo.figshare.com/articles/dataset/_/5720248)
Supplement: Supplementary file 2 [file Table_2.xls]

## Sheet: Table_2
<b>Domains evaluated</b>	<b>Quality</b>	<b>% Before (N = 31)</b>	<b>% After (N = 31)</b>	<b>RR</b>	<b>P</b>
Vital signs	Complete	16.13	100.00	6.20	< 0.01
	Partial	67.74	0.00	42.00	< 0.01
	Absent	16.13	0.00	10.00	0.06
Palpation of lymph nodes	Complete	6.45	77.42	12.00	< 0.01
	Partial	29.03	22.58	0.78	0.79
	Absent	64.52	0.00	40.00	< 0.01
Thyroid palpation	Complete	0.00	61.29	not estimable	< 0.01
	Partial	16.13	6.45	0.40	0.45
	Absent	83.87	32.26	0.38	< 0.01
Cardiovascular system	Complete	3.23	74.19	23.00	< 0.01
	Partial	96.77	25.81	0.27	< 0.01
	Absent	0.00	0.00	not estimable	1.00
Pulmonary system	Complete	22.58	90.32	4.00	< 0.01
	Partial	77.42	9.68	0.13	< 0.01
	Absent	0.00	0.00	not estimable	1.00
Abdomen	Complete	22.58	74.19	3.29	0.01
	Partial	77.42	25.81	0.33	< 0.01
	Absent	0.00	0.00	not estimable	1.00
Neurologic	Complete	0.00	22.58	not estimable	0.02
	Partial	25.81	70.97	2.75	< 0.01
	Absent	74.19	6.45	0.09	< 0.01
Neurological Oral cavity examination	Complete	6.45	67.74	10.50	< 0.01
	Partial	6.45	29.03	4.50	0.07
	Absent	87.10	3.23	0.04	< 0.01
Ophthalmoscopy	Complete	0.00	32.26	not estimable	<0.01
	Partial	0.00	3.23	not estimable	1.00
	Absent	100.00	64.52	0.65	< 0.01
Otoscopy	Complete	0.00	64.52	not estimable	< 0.01
	Partial	0.00	9.68	not estimable	0.25
	Absent	100.00	25.81<a href="#TFN5">***</a>	0.26	< 0.01
Breast<a href="#TFN3">*</a>	Complete	0.00	36.84	not estimable	0.02
	Partial	5.26	31.58	6.00	0.13
	Absent	94.74	31.58<a href="#TFN5">***</a>	0.33	< 0.01
Testicles<a href="#TFN4">**</a>	Complete	0.00	8.33	not estimable	1.00
	Partial	0.00	16.67	not estimable	0.50
	Absent	100.00	75.00	0.75	0.25
Anthropometric measurements	Complete	0.00	45.16	not estimable	< 0.01
	Partial	9.68	25.81	2.67	0.22
	Absent	90.32	29.03<a href="#TFN5">***</a>	0.32	< 0.01
Ankle-brachial index	Complete	0.00	83.87	not estimable	< 0.01
	Partial	0.00	6.45	not estimable	0.50
	Absent	100.00	9.68	0.10	< 0.01
