# Supplementary material
Source: publisher figshare collection journal article supplement (https://scielo.figshare.com/articles/dataset/_/5720248)
Supplement: Supplementary file 3 [file Table_3.xls]

## Sheet: Table_3
<b>Overall score before (min. and max. median) N = 31</b>	<b>Overall score after (min. and max. median) N = 31</b>	<b>Difference between medians</b>	<b>P</b>
1.92 (1.15–5.38)	7.31 (4.23–10.0)	5.38	< 0.01
